# Supplementary material for: Home-Based Exercise Prehabilitation During Preoperative Treatment for Pancreatic Cancer Is Associated With Improvement in Physical Function and Quality of Life
Source: PubMed Central journal article supplement — Integr Cancer Ther. 2019 Dec 20;18:1534735419894061. doi: 10.1177/1534735419894061 (PMC7050956; doi:10.1177/1534735419894061), 2019-12-20
Supplement: Supplementary_Table_1_PancOutcomes.pdf [file Supplementary_Table_1_PancOutcomes.pdf]

**Supplementary Table 1.** Patient-reported exercise, physical activity, and sedentary time and accelerometer-measured objective measures\*

| <b>Variable</b>                         | <b>n</b> | <b>Mean ± standard deviation, minutes</b> |
|-----------------------------------------|----------|-------------------------------------------|
| Patient-reported aerobic exercise       | 42       | 126 ± 83                                  |
| Patient-reported strengthening exercise | 42       | 39 ± 33                                   |
| Accelerometer-measured MVPA             | 44       | 158.7 ± 146.7                             |
| Accelerometer-measured LPA              | 44       | 923.7 ± 294.5                             |
| Accelerometer-measured SA               | 44       | 4462.9 ± 620.2                            |

Abbreviations: MVPA, moderate-to-vigorous physical activity; LPA, light physical activity; SA, sedentary activity.

\*Information reported in [Blinded reference] In press.
